# Supplementary material for: Rapid diffusion of H2 and strong adsorption of D2 in Ni-4PyC realized the efficient separation of H2/D2 by gas chromatography
Source: Royal Society of Chemistry journal article supplement (doi:10.1039/d3dt01143g), 2023-01-01
Supplement: d3dt01143g1.pdf [file d3dt01143g1.pdf]

# Rapid diffusion of H<sub>2</sub> and strong adsorption of D<sub>2</sub> in Ni-4PyC realized the efficient separation of H<sub>2</sub>/D<sub>2</sub> by gas chromatography

Lingyun Kong, Enming Ping, Chunyan Ding, Lijuan Zhang\*, Yunshan Zhou\*, Nan Chen

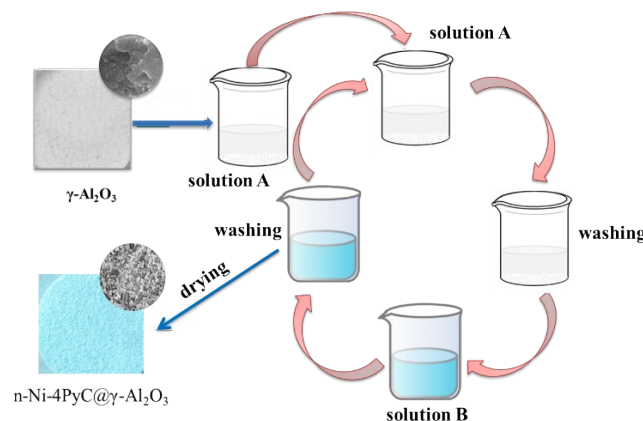

Fig. S1 The synthesis process scheme of Ni-4PyC@ $\gamma$ -Al<sub>2</sub>O<sub>3</sub>

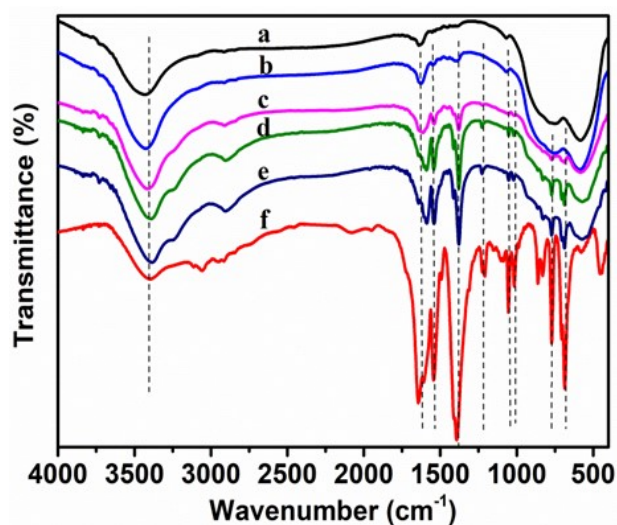

Fig. S2 IR spectra of (a)  $\gamma$ -Al<sub>2</sub>O<sub>3</sub>, (b) 1-Ni-4PyC@ $\gamma$ -Al<sub>2</sub>O<sub>3</sub>, (c) 3-Ni-4PyC@ $\gamma$ -Al<sub>2</sub>O<sub>3</sub>, (d) 5-Ni-4PyC@ $\gamma$ -Al<sub>2</sub>O<sub>3</sub>, (e) 7-Ni-4PyC@ $\gamma$ -Al<sub>2</sub>O<sub>3</sub>, (f) Ni-4PyC.

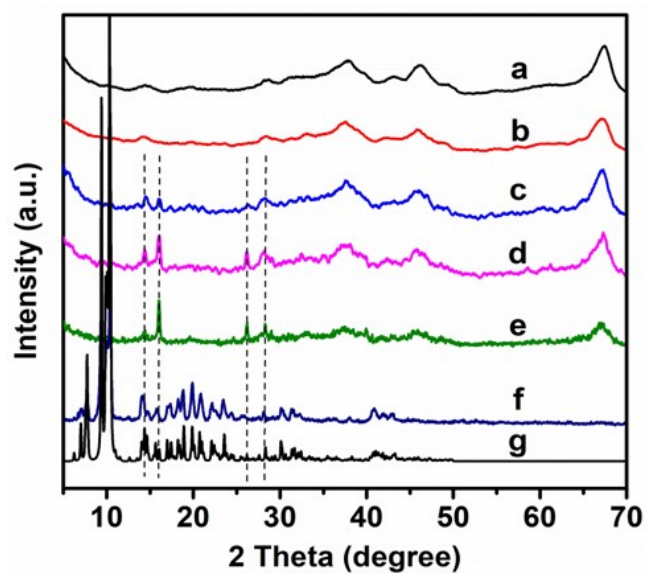

Fig. S3 The PXR D spectra of (a)  $\gamma$ -Al<sub>2</sub>O<sub>3</sub>, (b) 1-Ni-4PyC@ $\gamma$ -Al<sub>2</sub>O<sub>3</sub>, (c) 3-Ni-4PyC@ $\gamma$ -Al<sub>2</sub>O<sub>3</sub>, (d) 5-Ni-4PyC@ $\gamma$ -Al<sub>2</sub>O<sub>3</sub>, (e) 7-Ni-4PyC@ $\gamma$ -Al<sub>2</sub>O<sub>3</sub>, (f) Ni-4PyC, (g) Ni-4PyC (simulated).

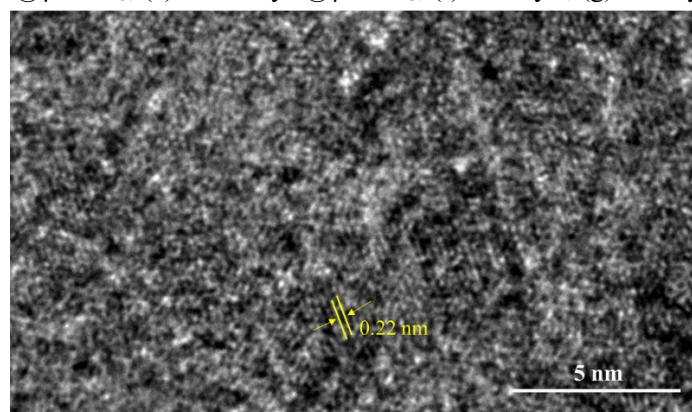

Fig. S4 HRTEM image of 7-Ni-4PyC@ $\gamma$ -Al<sub>2</sub>O<sub>3</sub>

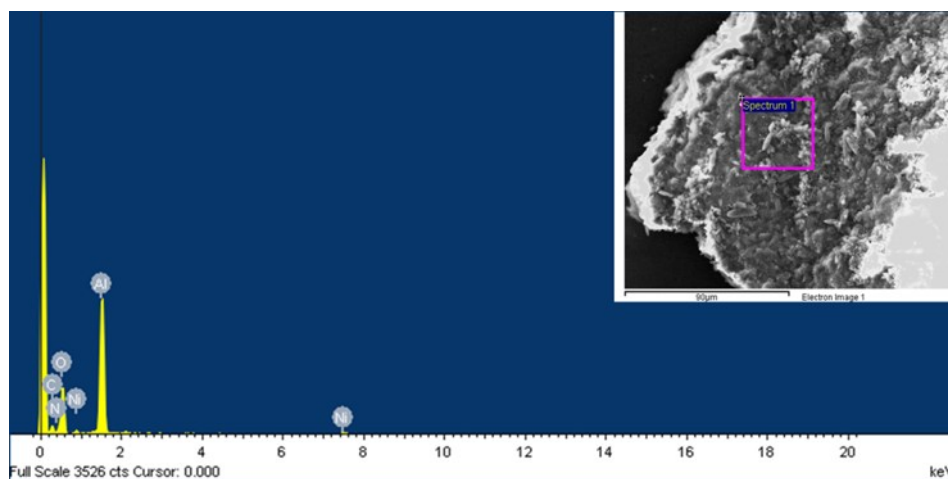

Fig. S5 The EDS spectrum of 3-Ni-4PyC@ $\gamma$ -Al<sub>2</sub>O<sub>3</sub>.

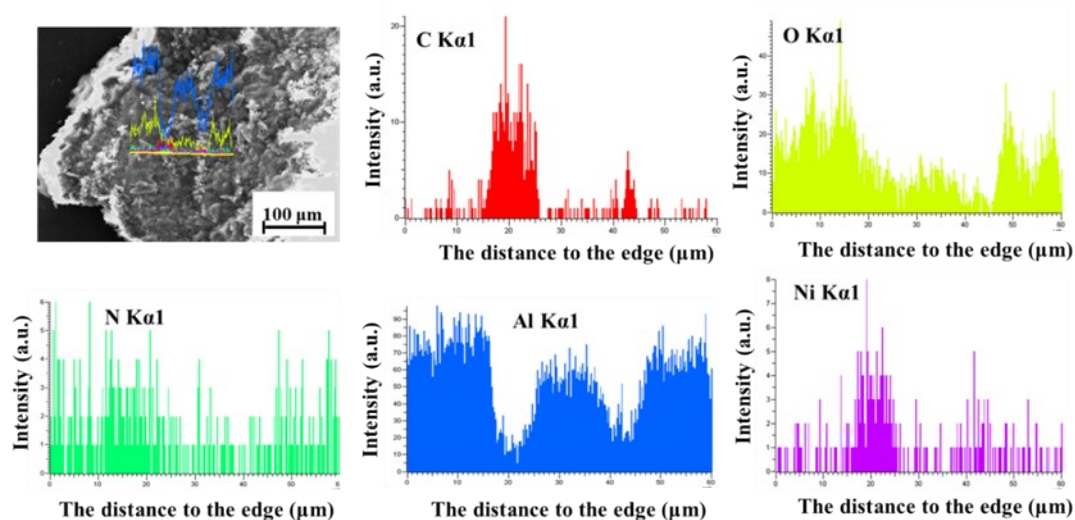

Fig. S6 EDS line scan of 3-Ni-4PyC@ $\gamma$ -Al<sub>2</sub>O<sub>3</sub>.

Table S1. BET surface area, pore volume and average aperture of  $\gamma$ -Al<sub>2</sub>O<sub>3</sub>, 3-Ni-4PyC@ $\gamma$ -Al<sub>2</sub>O<sub>3</sub>.

| Chromatographic packing                             | Specific surface area (m <sup>2</sup> /g) | Pore volume (cm <sup>3</sup> /g) | Micropore volume (cm <sup>3</sup> /g) | Average pore size (nm) |
|-----------------------------------------------------|-------------------------------------------|----------------------------------|---------------------------------------|------------------------|
| $\gamma$ -Al <sub>2</sub> O <sub>3</sub>            | 205.2                                     | 0.484                            |                                       | 7.64                   |
| 3-Ni-4PyC@ $\gamma$ -Al <sub>2</sub> O <sub>3</sub> | 207.2                                     | 0.174                            | 0.039                                 | 3.35                   |

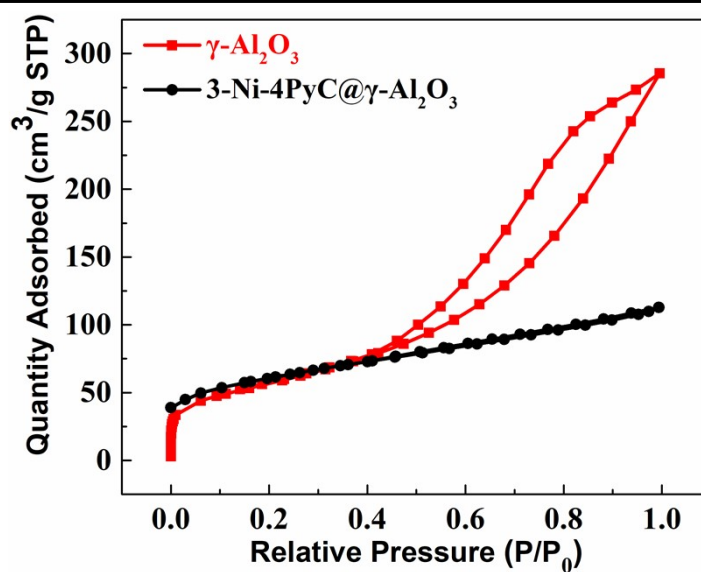

Fig. S7 N<sub>2</sub> adsorption-desorption isotherms of  $\gamma$ -Al<sub>2</sub>O<sub>3</sub> and 3-Ni-4PyC@ $\gamma$ -Al<sub>2</sub>O<sub>3</sub>.

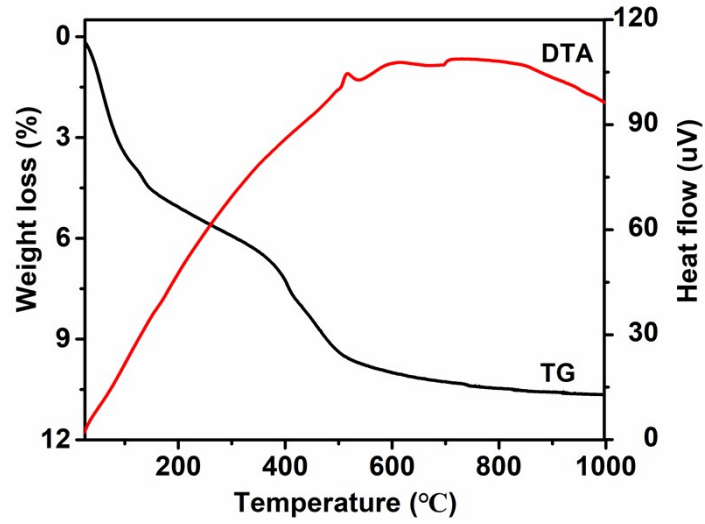

Fig. S8 TG-DTA curves of 3-Ni-4PyC@ $\gamma$ -Al<sub>2</sub>O<sub>3</sub>.

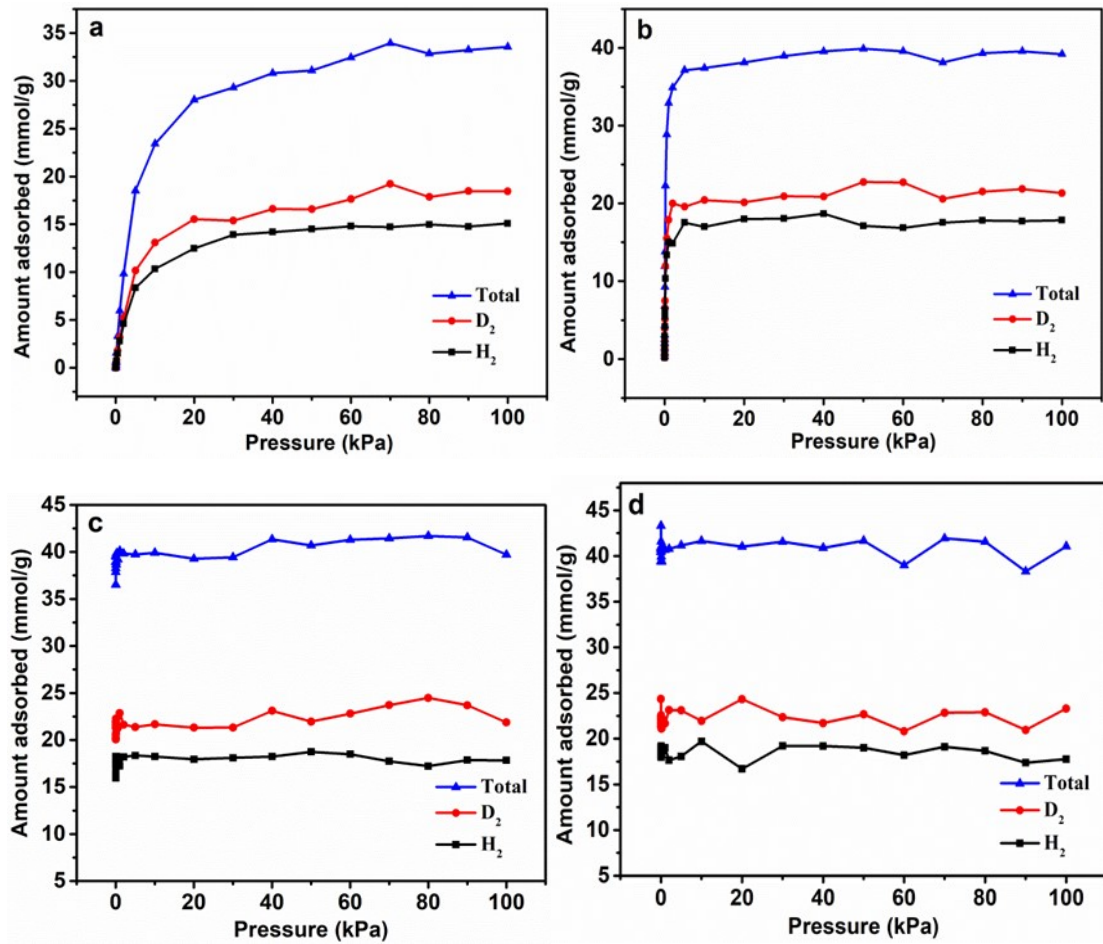

Fig. S9 Variations with pressure of each adsorption amount and total adsorption amount of the mixed gas (H<sub>2</sub>:D<sub>2</sub> = 1:1) in the Ni-4PyC at different temperatures: (a) 77 K, (b) 60 K, (c) 40 K, (d) 20 K.

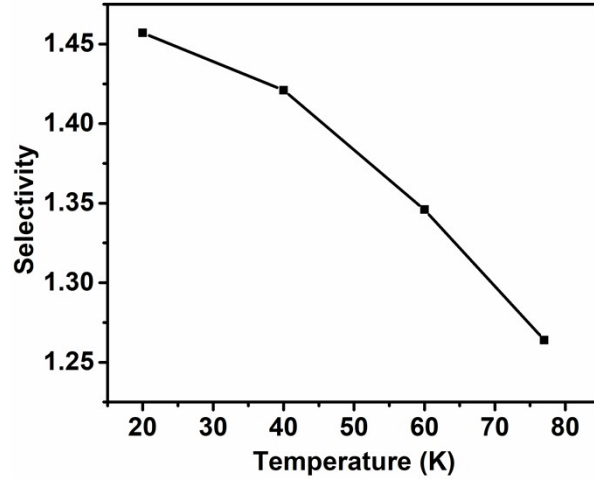

Fig. S10 The best adsorption selectivity of mixed  $D_2/H_2$  ( $D_2:H_2 = 1:1$ ) obtained under different temperature in Ni-4PyC

Table S2. The selectivity of  $D_2/H_2$  at Ni-4PyC at different temperatures and pressures

| pressure (kP) | Selectivity ( $D_2/H_2$ ) |       |       |        |
|---------------|---------------------------|-------|-------|--------|
|               | 77K                       | 60K   | 40K   | 20K    |
| a)            |                           |       |       |        |
| 0.001         | 1.167                     | 1.134 | 1.289 | 1.202  |
| 0.002         | 1.182                     | 1.139 | 1.153 | 1.180  |
| 0.004         | 1.257                     | 1.147 | 1.338 | 1.283  |
| 0.006         | 1.139                     | 1.115 | 1.220 | 1.186  |
| 0.008         | 1.217                     | 1.124 | 1.243 | 1.207  |
| 0.01          | 1.165                     | 1.125 | 1.210 | 1.159  |
| 0.02          | 1.093                     | 1.146 | 1.244 | 1.255  |
| 0.04          | 1.074                     | 1.321 | 1.168 | 1.169  |
| 0.06          | 1.155                     | 1.235 | 1.295 | 1.138  |
| 0.08          | 1.184                     | 1.196 | 1.160 | 1.145  |
| 0.1           | 1.182                     | 1.182 | 1.213 | 1.156  |
| 0.2           | 1.112                     | 1.155 | 1.183 | 1.157  |
| 0.5           | 1.215                     | 1.159 | 1.184 | 1.183  |
| 1             | 1.141                     | 1.188 | 1.326 | 1.140  |
| 2             | 1.139                     | 1.345 | 1.188 | 1.311  |
| 5             | 1.217                     | 1.117 | 1.165 | 1.279  |
| 10            | 1.264*                    | 1.202 | 1.187 | 1.114  |
| 20            | 1.245                     | 1.119 | 1.187 | 1.457* |
| 30            | 1.106                     | 1.159 | 1.178 | 1.164  |
| 40            | 1.170                     | 1.117 | 1.267 | 1.131  |

|     |       |        |        |       |
|-----|-------|--------|--------|-------|
| 50  | 1.144 | 1.330  | 1.171  | 1.193 |
| 60  | 1.192 | 1.346* | 1.233  | 1.144 |
| 70  | 1.250 | 1.174  | 1.337  | 1.195 |
| 80  | 1.192 | 1.209  | 1.421* | 1.227 |
| 90  | 1.252 | 1.233  | 1.326  | 1.205 |
| 100 | 1.223 | 1.195  | 1.226  | 1.312 |

\*Indicates the maximum selectivity at each temperature

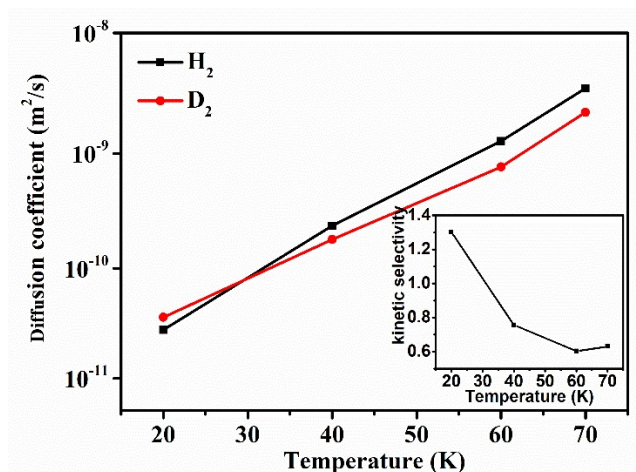

Fig. S11. The effect of temperature on the diffusion coefficients of H<sub>2</sub> and D<sub>2</sub> in Ni-4PyC. Inset: Kinetic selectivity of D<sub>2</sub> to H<sub>2</sub> at different temperatures. Temperature: 20, 40, 60, 77 K.

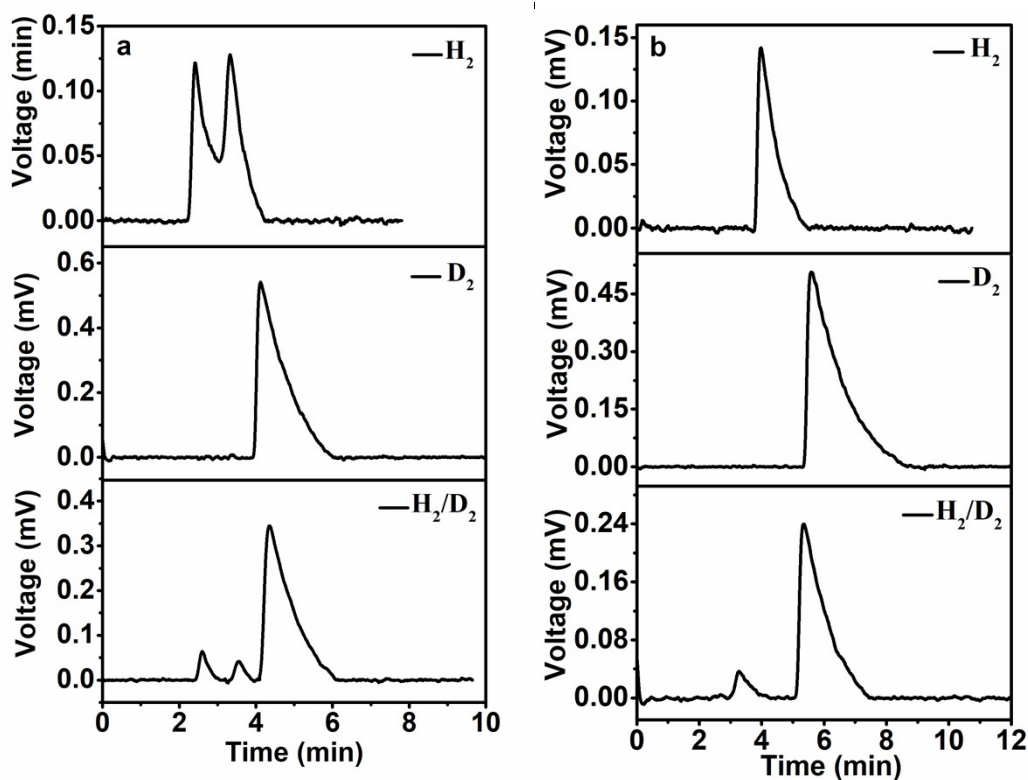

Fig. S12 The gas chromatogram of H<sub>2</sub>, D<sub>2</sub> and H<sub>2</sub>/D<sub>2</sub>(1:1) separation on stationary phase packing

(a)  $\gamma$ -Al<sub>2</sub>O<sub>3</sub> and (b) 3-Ni-4PyC@ $\gamma$ -Al<sub>2</sub>O<sub>3</sub>. Experimental conditions: column length 60 cm; injection volume 50  $\mu$ L; carrier gas flow rate 30 mL/min.

Table S3. Various parameters for chromatographic separation of H<sub>2</sub> and D<sub>2</sub> on 3-Ni-4PyC@ $\gamma$ -Al<sub>2</sub>O<sub>3</sub> at different carrier gas flow rates.

| Carrier gas flow rate (mL/min) | Retention time (min) |                | Resolution | Separation time (min) |
|--------------------------------|----------------------|----------------|------------|-----------------------|
|                                | H <sub>2</sub>       | D <sub>2</sub> |            |                       |
| 10                             | 9.692                | 15.272         | 1.75       | 24.74                 |
| 20                             | 5.239                | 8.520          | 1.81       | 12.59                 |
| 30                             | 3.292                | 5.355          | 1.84       | 7.47                  |
| 60                             | 2.025                | 3.443          | 1.79       | 5.62                  |
| 90                             | 1.497                | 2.488          | 1.74       | 3.61                  |

Table S4. Under different injection volume, the separation parameters of H<sub>2</sub>/D<sub>2</sub> on 3-Ni-4PyC@ $\gamma$ -Al<sub>2</sub>O<sub>3</sub>.

| Injection volume ( $\mu$ L) | Retention time (min) |                | Peak height (mv) |                | Peak area (mV·min) |                | Resolution | Separation time (min) |
|-----------------------------|----------------------|----------------|------------------|----------------|--------------------|----------------|------------|-----------------------|
|                             | H <sub>2</sub>       | D <sub>2</sub> | H <sub>2</sub>   | D <sub>2</sub> | H <sub>2</sub>     | D <sub>2</sub> |            |                       |
|                             | 50                   | 3.292          | 5.355            | 37.84          | 244.109            | 742.2          |            |                       |
| 100                         | 3.112                | 5.272          | 102.633          | 390.191        | 2118.9             | 18945          | 1.79       | 8.42                  |
| 150                         | 2.931                | 4.986          | 162.856          | 543.658        | 3784.6             | 29560.201      | 1.76       | 7.67                  |
| 200                         | 2.961                | 4.912          | 218.518          | 720.192        | 5223.4             | 42026.898      | 1.64       | 8.41                  |
| 250                         | 3.313                | 5.416          | 278.492          | 843.886        | 6393.4             | 56517.699      | 1.59       | 9.97                  |

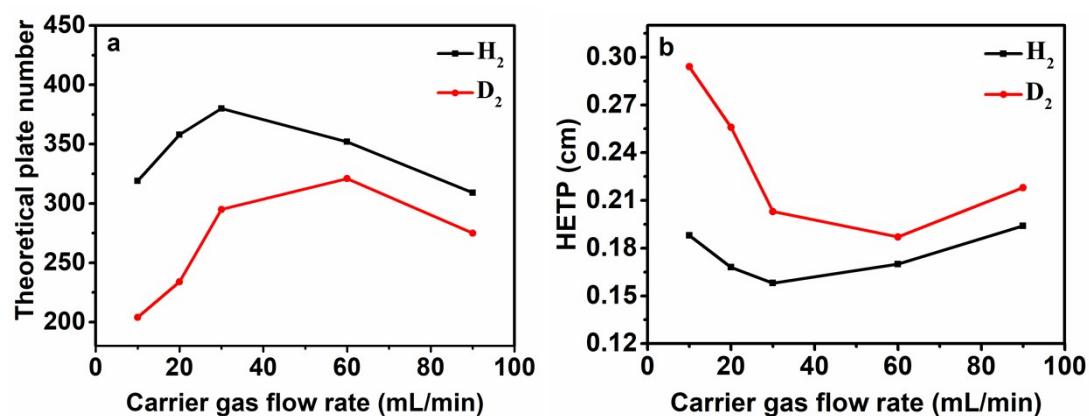

Fig. S13 (a) The relationship between the n of H<sub>2</sub>/D<sub>2</sub> and the carrier gas flow rate, (b) the relationship between the HETP of H<sub>2</sub>/D<sub>2</sub> and the carrier gas flow rate.

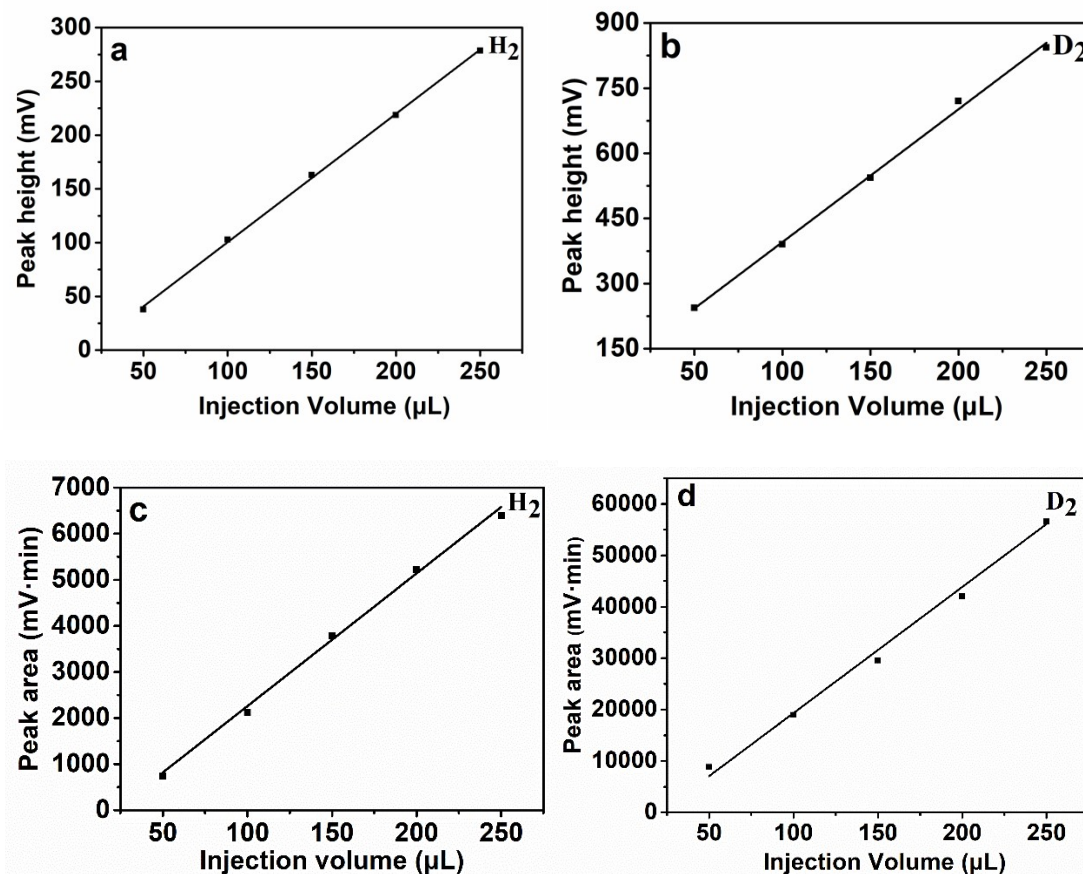

Fig. S14 Relationship between peak height (a, b), peak area (c, d) of H<sub>2</sub>/D<sub>2</sub> and H<sub>2</sub>/D<sub>2</sub> injection volume (H<sub>2</sub>:D<sub>2</sub> = 1:1)

Table S5. Reproducibility of retention time, peak height and peak area of pure H<sub>2</sub> and D<sub>2</sub> component, and the corresponding relative standard deviation percentage (%RSD) with 3-Ni-4PyC@γ-Al<sub>2</sub>O<sub>3</sub> packed column.

| Times | H <sub>2</sub>       |             |                    | D <sub>2</sub>       |             |                    |
|-------|----------------------|-------------|--------------------|----------------------|-------------|--------------------|
|       | Retention time (min) | Peak height | Peak area (mV·min) | Retention time (min) | Peak height | Peak area (mV·min) |
| 1     | 3.324                | 78.839      | 1702.043           | 5.392                | 466.935     | 22524.670          |
| 2     | 3.343                | 82.111      | 1711.186           | 5.404                | 464.715     | 20316.460          |
| 3     | 3.348                | 73.780      | 1698.600           | 5.379                | 483.739     | 22001.070          |
| 4     | 3.341                | 78.959      | 1700.471           | 5.388                | 468.482     | 21605.870          |
| 5     | 3.326                | 76.862      | 1649.029           | 5.299                | 464.103     | 20973.870          |
| 6     | 3.290                | 82.799      | 1648.314           | 5.319                | 508.373     | 21875.270          |
| 7     | 3.288                | 78.809      | 1646.900           | 5.338                | 497.823     | 21516.570          |



|         |       |        |          |       |         |           |
|---------|-------|--------|----------|-------|---------|-----------|
| 8       | 3.272 | 87.097 | 1565.543 | 5.310 | 478.767 | 20455.200 |
| 9       | 3.276 | 77.576 | 1640.500 | 5.327 | 514.994 | 22331.400 |
| 10      | 3.372 | 79.067 | 1683.767 | 5.372 | 481.108 | 21816.370 |
| Average | 3.318 | 79.590 | 1664.635 | 5.353 | 482.904 | 21541.675 |
| SD      | 0.033 | 3.466  | 41.948   | 0.036 | 17.520  | 706.857   |
| RSD(%)  | 0.983 | 4.354  | 2.520    | 0.723 | 3.628   | 3.281     |

Table S6. Reproducibility of H<sub>2</sub>/D<sub>2</sub> (25 μL:25 μL) separation and the corresponding standard deviation (SD), relative standard deviation percentage (%RSD), relative deviation percentage (%) under optimal conditions\* with 3-Ni-4PyC@γ-Al<sub>2</sub>O<sub>3</sub> packed column.

| Times   | Retention time (min) |                | Peak Area (S <sub>H<sub>2</sub></sub> and S <sub>D<sub>2</sub></sub> ) of components in mixed samples (mV·min) |                | Content determined (%) |                | Relative deviation (%) |                |
|---------|----------------------|----------------|----------------------------------------------------------------------------------------------------------------|----------------|------------------------|----------------|------------------------|----------------|
|         | H <sub>2</sub>       | D <sub>2</sub> | H <sub>2</sub>                                                                                                 | D <sub>2</sub> | H <sub>2</sub>         | D <sub>2</sub> | H <sub>2</sub>         | D <sub>2</sub> |
| 1       | 3.522                | 6.027          | 798.548                                                                                                        | 10412.098      | 47.97                  | 48.33          | -4.06                  | -3.331         |
| 2       | 3.572                | 6.080          | 848.677                                                                                                        | 10905.917      | 50.98                  | 50.63          | 1.97                   | 1.254          |
| 3       | 3.500                | 6.045          | 836.387                                                                                                        | 11265.221      | 50.24                  | 52.30          | 0.49                   | 4.590          |
| 4       | 3.577                | 5.980          | 838.177                                                                                                        | 10482.799      | 50.35                  | 48.66          | 0.70                   | -2.674         |
| 5       | 3.545                | 5.988          | 833.645                                                                                                        | 11217.903      | 50.08                  | 52.08          | 0.16                   | 4.151          |
| 6       | 3.597                | 6.072          | 799.516                                                                                                        | 10408.211      | 48.03                  | 48.32          | -3.94                  | -3.367         |
| 7       | 3.577                | 6.065          | 867.048                                                                                                        | 10833.448      | 52.09                  | 50.29          | 4.17                   | 0.581          |
| 8       | 3.567                | 5.998          | 849.516                                                                                                        | 10390.544      | 51.03                  | 48.23          | 2.07                   | -3.531         |
| 9       | 3.585                | 5.978          | 866.468                                                                                                        | 11041.525      | 52.05                  | 51.26          | 4.10                   | 2.513          |
| 10      | 3.578                | 5.996          | 825.952                                                                                                        | 10729.270      | 49.62                  | 49.81          | -0.76                  | -0.386         |
| Average | 3.562                | 6.023          | 836.394                                                                                                        | 10768.694      | 50.24                  | 49.99          | 0.49                   | -0.02          |
| SD      | 0.029                | 0.038          | 22.537                                                                                                         | 320.809        | 1.354                  | 1.492          | /                      | /              |
| RSD(%)  | 0.810                | 0.629          | 2.695                                                                                                          | 2.979          | 2.695                  | 2.985          | /                      | /              |

\*Peak area (mV·min) of pure H<sub>2</sub> and D<sub>2</sub> was 1664.635 and 21541.675, and their corresponding theoretical content was 50% respectively.
